# Supplementary material
Source: PubMed Central journal article supplement (PMC6921480)
Supplement: NIHMS1062820-supplement-Erratum.pdf [file NIHMS1062820-supplement-Erratum.pdf]

### Bacterial Sexually Transmitted Infections Among HIV-Infected Patients in the United States: Estimates From the Medical Monitoring Project: Erratum

The article that appears on Page 171–179 of the April 2015 issue of *Sexually Transmitted Diseases* displays errors in Table 4. Footnotes §, ¶, ||, \*\*, and †† are associated with the incorrect information in the table. Please see below for corrected Table 4.

**TABLE 4.** Percentages\* of HIV-Infected Adults Receiving Medical Care in the United States at Elevated Sexual Risk Who Were Repeatedly Tested for BSTIs Within the Past 12 Months, by Sex/Sexual Orientation, Demographic, and Other Attributes—MMP

| Repeat Testing <sup>†</sup> ,<br>Restricted to Participants<br>at Elevated Sexual Risk <sup>‡</sup> | Syphilis                 |                                             | Gonorrhea     |                                              | Chlamydia     |                                              |
|-----------------------------------------------------------------------------------------------------|--------------------------|---------------------------------------------|---------------|----------------------------------------------|---------------|----------------------------------------------|
|                                                                                                     | %<br>(95% CI)            | Prevalence Ratio<br>(99.4% CI) <sup>¶</sup> | %<br>(95% CI) | Prevalence Ratio<br>(99.7% CI) <sup>  </sup> | %<br>(95% CI) | Prevalence Ratio<br>(99.7% CI) <sup>  </sup> |
| <b>MSM</b>                                                                                          |                          |                                             |               |                                              |               |                                              |
| Age group, y                                                                                        |                          |                                             |               |                                              |               |                                              |
| 18–34                                                                                               | 30 (24–38)               | 1.2 (0.8–1.8)                               | 10 (6–15)     | 1.5 (0.7–3.2)                                | 9 (5–14)      | 1.4 (0.7–3.1)                                |
| ≥35                                                                                                 | 25** (21–30)             | 1.0                                         | 6 (4–9)       | 1.0                                          | 6 (4–8)       | 1.0                                          |
| Race/Ethnicity                                                                                      |                          |                                             |               |                                              |               |                                              |
| White non-Hispanic                                                                                  | 22 (17–28)               | 1.0                                         | 6 (4–8)       | 1.0                                          | 5 (3–7)       | 1.0                                          |
| Black non-Hispanic                                                                                  | 26 (19–34)               | 1.2 (0.7–2.1)                               | 8 (5–15)      | 1.5 (0.6–4.0)                                | 9 (5–15)      | 2.0 (0.8–4.8)                                |
| Hispanic                                                                                            | 37 <sup>††</sup> (27–48) | 1.7 (1.0–2.9)                               | 7 (4–13)      | 1.3 (0.6–2.9)                                | 8 (4–14)      | 1.7 (0.7–3.9)                                |
| Other, including multiracial                                                                        | 34 (24–46)               | 1.6 (0.8–2.9)                               | 14 (7–26)     | 2.4 (0.8–7.2)                                | 11 (6–20)     | 2.5 (0.9–6.8)                                |
| No. CD4/VL tests in the past 12 mo <sup>§</sup>                                                     |                          |                                             |               |                                              |               |                                              |
| 0–2                                                                                                 | 12 <sup>‡‡</sup> (8–18)  | 1.0                                         | 2 (1–6)       | 1.0                                          | 3 (1–6)       | 1.0                                          |
| ≥3                                                                                                  | 37 (31–43)               | 3.1 (1.7–5.8) <sup>§§</sup>                 | 10 (7–14)     | 4.1 (1.2–14.3) <sup>¶¶</sup>                 | 9 (7–13)      | 3.6 (1.1–12.3) <sup>¶¶</sup>                 |
| <b>MSW</b>                                                                                          |                          |                                             |               |                                              |               |                                              |
| Age group, y                                                                                        |                          |                                             |               |                                              |               |                                              |
| 18–34                                                                                               | 11 (4–31)                | 0.6 (0.1–2.9)                               | 4 (1–18)      | 1.1 (0.1–18.6)                               | 4 (1–18)      | 1.1 (0.1–15.1)                               |
| ≥35                                                                                                 | 20 (13–29)               | 1.0                                         | 4 (1–11)      | 1.0                                          | 4 (1–11)      | 1.0                                          |
| Race/Ethnicity                                                                                      |                          |                                             |               |                                              |               |                                              |
| White non-Hispanic                                                                                  | 18 (7–40)                | 1.0                                         | 0             | —                                            | 0             | —                                            |
| Black non-Hispanic                                                                                  | 17 (10–27)               | 0.9 (0.2–3.7)                               | 3 (1–8)       | 1.0                                          | 3 (1–8)       | 1.0                                          |
| Hispanic                                                                                            | 28 (17–42)               | 1.5 (0.4–5.5)                               | 10 (2–32)     | 2.9 (0.4–24.2)                               | 10 (2–32)     | 2.9 (0.4–24.2)                               |
| Other, including multiracial                                                                        | 13 (2–55)                | 0.7 (0.0–11.4)                              | 0             | —                                            | 0             | —                                            |
| No. CD4/VL tests in past 12 mo <sup>§</sup>                                                         |                          |                                             |               |                                              |               |                                              |
| 0–2                                                                                                 | 3 (1–7)                  | 1.0                                         | 2 (0–12)      | 1.0                                          | 2 (0–12)      | 1.0                                          |
| ≥3                                                                                                  | 29 (20–40)               | 9.8 (2.7–36.2) <sup>§§</sup>                | 5 (2–12)      | 3.1 (0.3–33.1)                               | 5 (2–12)      | 3.1 (0.3–33.1)                               |
| <b>Women</b>                                                                                        |                          |                                             |               |                                              |               |                                              |
| Age group, y                                                                                        |                          |                                             |               |                                              |               |                                              |
| 18–34                                                                                               | 25 (14–39)               | 3.1 (1.5–6.6) <sup>§§</sup>                 | 20 (10–34)    | 8.0 (1.6–40.9) <sup>¶¶</sup>                 | 19 (10–34)    | 7.8 (1.5–40.6) <sup>¶¶</sup>                 |
| ≥35                                                                                                 | 8 (4–14)                 | 1.0                                         | 2 (1–6)       | 1.0                                          | 2 (1–6)       | 1.0                                          |
| Race/Ethnicity                                                                                      |                          |                                             |               |                                              |               |                                              |
| White non-Hispanic                                                                                  | 14 (7–26)                | 1.0                                         | 3 (1–12)      | 1.0                                          | 3 (1–12)      | 1.0                                          |
| Black non-Hispanic                                                                                  | 15 (8–25)                | 1.1 (0.4–3.1)                               | 10 (5–20)     | 3.1 (0.4–26.5)                               | 10 (5–20)     | 3.1 (0.4–26.5)                               |
| Hispanic                                                                                            | 6 (1–24)                 | 0.5 (0.0–4.3)                               | 6 (1–26)      | 1.8 (0.1–42.4)                               | 5 (1–28)      | 1.4 (0.0–50.9)                               |
| Other, including multiracial                                                                        | 9 (1–43)                 | 0.7 (0.1–7.7)                               | 0             | —                                            | 0             | —                                            |
| No. CD4/VL tests in past 12 mo <sup>§</sup>                                                         |                          |                                             |               |                                              |               |                                              |
| 0–2                                                                                                 | 1 (0–5)                  | 1.0                                         | 1 (0–7)       | 1.0                                          | 1 (0–7)       | 1.0                                          |
| ≥3                                                                                                  | 20 (12–32)               | 14.3 (2.3–90.1) <sup>§§</sup>               | 12 (7–21)     | 12.5 (0.5–293.2)                             | 12 (6–21)     | 12.3 (0.5–289.3)                             |

\*Percentages are national estimates of HIV-infected adults receiving medical care in the United States who reported risky sexual activity<sup>‡</sup> and were repeatedly tested for the specified BSTIs within the 12-month surveillance period.

<sup>†</sup>Repeat testing was defined as 0–1 vs. ≥2 tests at least 3 months apart during the past 12 months.

<sup>‡</sup>Defined as persons reporting more than 1 sexual partner or illicit drug use before/during sex during the past 12 months, or persons with only 1 sexual partner who reported sex without a condom with either a casual sexual partner, HIV-negative partner, or partner of unknown HIV status.

<sup>§</sup>Defined as 0–2 vs. ≥3 tests at least 3 months apart during the past 12 months.

<sup>¶</sup>CI for syphilis testing prevalence ratios were adjusted for 8 multiple statistical comparisons within each sex/sexual orientation group.

<sup>||</sup>CI for gonorrhea and chlamydia testing prevalence ratios were adjusted for 16 multiple statistical comparisons within each sex/sexual orientation group.

\*\*Among those aged 35 years or older, prevalence was significantly higher for MSM compared with women ( $P < 0.001$ ).

<sup>††</sup>Among Hispanics, prevalence was significantly higher for MSM compared with women ( $P < 0.001$ ).

<sup>‡‡</sup>Among those receiving 0 to 2 CD4/VL tests, prevalence was significantly higher for MSM compared with MSW ( $P = 0.001$ ) and women ( $P < 0.001$ ).

<sup>§§</sup>Statistically significant after adjusting for multiple comparisons for syphilis tests ( $P \leq 0.006$ ).

<sup>¶¶</sup>Statistically significant after adjusting for multiple comparisons for gonorrhea and chlamydia tests ( $P \leq 0.003$ ).

**Reference:**

Flagg EW, Weinstock HS, Frazier EL, et al. Bacterial Sexually Transmitted Infections Among HIV-Infected Patients in the United States: Estimates From the Medical Monitoring Project. *Sex Trans Dis.* 2015; 42:171–179.
